# Supplementary material for: Therapeutic Role and Potential Mechanism of Resveratrol in Atherosclerosis: TLR4/NF-κB/HIF-1α
Source: Mediators Inflamm. 2023 May 31;2023:1097706. doi: 10.1155/2023/1097706 (PMC10247328; doi:10.1155/2023/1097706)
Supplement: Supplementary Materials — The supplementary material for this article can be found. Supplementary Table 1: the identified 98 potential targets of resveratrol. Supplementary Table 2: the identified 1364 genes relevant to atherosclerosis. [file 1097706.f1.zip]

Archive with 2 entries (2 files):
- Table_1(Drug target).docx
- Table_2(Disease target).docx
